# Supplementary material for: Effects of Different Physical Activity Interventions on Symptoms of Anxiety and Depression in Children and Adolescents ：A Network Meta-Analysis of Randomized Controlled Trials
Source: Research Square preprint supplement (doi:10.21203/rs.3.rs-5333782/v1), 2024-11-20
Supplement: Supplementary file 1 [file 9c98877172497cb9c017f790.docx]

**Tables
Table 1** Search strategy on PubMed

**Table 2** Patient characteristics of included 25 studies.

**Table 3** Mathodogical quality of included studies

**Table 4** Ranking of SUCRA probabilities

**Table 1** Search strategy on PubMed

| **Database** | **Search strategy** | **amount** |
| --- | --- | --- |
| **PubMed** | | |
| #1 | Search: anxiety[MeSH Terms] | 116,347 |
| #2 | Search: “anxiety” OR “Angst” OR “Social Anxiety” OR “Anxieties, Social” OR “Anxiety, Social” OR “Social Anxieties” OR “anxiety disorder“ | 11,470 |
| #3 | #1 OR #2 | 13,440 |
| #4 | Search: Exercise[MeSH Terms] | 248,693 |
| #5 | Search:”Exercise” OR “Exercises” OR “Physical Activity” OR “Physical Activities” OR “Motor Activity” OR “Sport” OR “Aerobics” OR “Training” OR “Trainings” OR “Jogging” OR “Walking” OR “Ambulation Yoga” OR “Swimming” OR “Dancing” OR “Cycling” OR “Resistance” OR “Pilates” OR “Stretching” OR “physically active” OR “biking” OR “anaerobic” OR “strength training” OR “resistance training” OR “weight training” OR “Running” | 6,096,323 |
| #6 | #4 OR #5 | 6,096,323 |
| #7 | Search:child[MeSH Terms] | 2,191,819 |
| #8 | Search:”child” OR “Children” OR “Adolescent” OR “Teen” OR “Youth” OR “Teenager” | 4,436,912 |
| #9 | #7 OR #9 | 4,436,912 |
| #10 | Search:”Randomized controlled trial” OR “controlled clinical trial”OR “randomized” OR “placebo” OR “randomly” | 1,890,399 |
| #11 | #3AND#6AND#9 | 26,097 |
| #12 | #11AND#10 | 4,624 |

**Table 2** Patient characteristics of included 25 studies

| **study** | **Country** | **Sample size** | | **Gender (M/F)** | **Mean Age (year)** | | **Intervention** | | | | | | **Outcome diagnostics** |
| --- | --- | --- | --- | --- | --- | --- | --- | --- | --- | --- | --- | --- | --- |
| **EG** | **CG** | **EG** | **CG** | **EG** | | | **CG** | | |
| **Intervention content** | **Intervention session, frequency, period** | **Tape** | **Intervention content** | **Intervention time, frequency, period** | **Tape** |
| Brush et al., 2020 [85] | America | 35 | 31 | 17/49 | 20.26 | 20.19 | Treadmill or cycle ergometer (intensity at 40% to 65% of heart rate reserve) | 45 min,  3 weekly,  8 weeks | Moderate-to-vigorous exercise | Low-intensity stretching | 30-45 min  3 weekly,  8 weeks | Stretching exercise | BDI-II |
| Uebelacker et al., 2022[62] | America | 21 | 21 | 7/35 | 15 | 14.8 | Yoga practice | 45 min,  1 weekly,  12 weeks | Mind-body exercise | Group Cognitive behavioral therapy sessions | 45 min,  1 weekly,  12 weeks | Cognitive behavioral therapy | 1.BDI-II  2.SCARED |
| Hughes et al., 2013[69] | America | 14 | 12 | 15/11 | 17 | 17 | Treadmill or cycling, or any preferred activity such as jazzercise, jogging, or weight training (aiming for more than 12 kcal/kg per week energy expenditure). | 30-40 min,  3 weekly,  12 weeks | Moderate-to-vigorous exercise | Low-intensity stretching | 30-40 min,  3 weekly,  12 weeks | Stretching exercise | CDRS-R |
| Saltan et al., 2021[70] | Turkey | 29/28 | 35 | 19/65 | 18.82/18.85 | 19.42 | EG1：Pilates: Through a series of mat exercises, Pilates strengthens the abdominal and hip muscles, emphasizing proper breathing, posture, and spinal stability. The difficulty of the exercises gradually increases as practice progresses.  EG2：Therapeutic exercise (education and communication, warm-up exercises, strengthening exercises, stretching, and relaxation). | 60 min,  3 weekly,  12week | EG1: Resistance training  EG2: Comprehensive exercise | No intervention | No intervention | No intervention | BDI-II |
| Bazzano et al., 2022[63]c | America | 40 | 42 | 44/38 | 12.3 | 12.4 | Yoga and mindfulness practices | 45 min,  1 weekly,  8 weeks | Mind-body exercise | No intervention | No intervention | No intervention | 1.PHQA  2.SCARED |
| Ahmed et al., 2023[71] | Australia | 160 | 160 | 185/135 | 14.4 | 14.2 | Health education+ physical training (aimed at increasing students' physical activity levels through fun and interactive methods) + outdoor activities during lunchtime. | 50 min,  1 weekly,  12 weeks | Mind-body exercise | No intervention | No intervention | No intervention | CESD-10 |
| Goldfield et al., 2015[72] | Canada | 75/78/75 | 76 | 91/213 | 15.5/15.9/15.5 | 15.6 | EG1：Exercise on a treadmill, elliptical machine, or cycle ergometer.  EG2：Perform seven exercises using weight machines or free weights (starting with two sets of 15 repetitions and gradually increasing to three sets of 8 repetitions, using the maximum weight that can be lifted for 8 consecutive repetitions).EG3：Aerobic+ Resistance training | 20-45 min,  4 weekly,  22 week | EG1: Moderate-to-vigorous exercise  EG2:  Resistance training  EG3: Comprehensive exercise | Dietary Control | No intervention | Usual care | BRUMS |
| Petty et al., 2009[73] | America | 69/70 | 68 | 117/90 | 9.3/9.5 | 9.4 | EG1： Low-dose aerobic exercise (with each participant's heart rate exceeding 150 beats per minute). EG2：High-dose interval aerobic exercise (performed in two 20-minute sessions). | EG1 20 min,  5 weekly,  13 weeks  EG2 40 min,  5 weekly,  13 weeks | EG1: Moderate-to-vigorous exercise  EG2: High-intensity interval training | No intervention | No intervention | No intervention | RCDS |
| Williams et al., 2019[74] | America | 90 | 85 | 60/115 | 9.3 | 9.4 | Various games and aerobic exercises, such as running games, ball games, and jump rope. | 40 min,  5 weekly,  34 weeks | Comprehensive exercise | Sedentary attention | No intervention | Cognitive behavioral therapy | CDI |
| Daley et al., 2006[75] | Britain | 44 | 37 | 36/45 | 13.1 | 13.2 | EG1： Intermittent aerobic activities (such as stepping, cycling, rowing, dancing, and walking).  EG 2：Light physical conditioning/stretching | EG1：30 min,  3 weekly,  8 weeks  EG2：60 min,  1 weekly,  8 weeks | EG1：High-intensity interval training EG2：Stretching exercise | No intervention | No intervention | No intervention | CDI |
| Philippot et al., 2022[64] | Belgium | 20 | 20 | 15/25 | 15.5 | 15.2 | Basketball, ultimate frisbee, soccer, floorball (singles), volleyball, and muscle-strengthening exercises, racquet sports (tennis, badminton, table tennis), cycling, and indoor wall climbing. | 30 min,  3 weekly,  8 weeks | Moderate-to-vigorous exercise | Social relaxation intervention | 60 min,  4 weekly,  5 weeks | Cognitive behavioral therapy | 1.HADS  2.HADS-anxiety |
| Tennant et al., 2017[65] | Australia | 12 | 12 | 9/15 | 8.8 | 8.6 | Motor coordination and physical activity encouragement courses. | 60 min,  1 weekly,  10 weeks | Comprehensive exercise | No intervention | No intervention | No intervention | 1.SMFQ  2.SCAS |
| Carei et al., 2010[66] | America | 30 | 27 | 50/10 | 15.5 | 15.2 | Yoga practice | 60 min,  1 weekly,  8 weeks | Mind-body exercise | Standard Medical Care Intervention | No intervention | Usual care | 1.BDI-II  2.STAI |
| Unarm et al., 2018[76] | Germany | 21/20 | 23 | 18/46 | 15.7 | 15.9 | EG1：Training performed on whole-body vibration equipment.  EG2: Stationary bike (ergometer) for cardiovascular training. | 30 min,  4 weekly,  6 weeks | EG1： Resistance training EG2：High-intensity interval training | treatment-as-usual | No intervention | CI | DIKJ |
| Zhang et al., 2018[77] | China | 32 | 32 | 23/41 | 18.41 | 18.41 | Mindfulness skills + 24-form simplified Tai Chi. | 90 min,  2 weekly,  8 weeks | Mind-body exercise | Regular physical education classes. | 90 min,  2 weekly,  8 weeks | Comprehensive exercise | PHQ-9 |
| Philippot et al., 2019[67] | Belgium | 12 | 11 | 11/12 | 10.7 | 10.6 | Higher-intensity running and interactive games, such as Resistance training and faster-paced games, to improve cardiovascular fitness and physical conditioning. | 50 min,  4 weekly,  5 weeks | Moderate-to-vigorous exercise | Low- to moderate-intensity activities include gentle movements and sedentary games, such as stretching, yoga, light jogging, and interactive play with children. | 50 min,  4 weekly,  5 weeks | Comprehensive exercise | 1.CDI 2:.BDI-13  3.IDSA |
| Jeong et al., 2005[68] | Korea | 20 | 20 | 0/40 | 16 | 16 | Dance movement therapy is a form of aerobic exercise that incorporates elements of psychotherapy. | 45 min,  3 weekly,  12 weeks | Mind-body exercise | No intervention | No intervention | No intervention | SCL-90-R |
| Dabidy et al., 2011[86] | Iran | 12 | 11 | 12/11 | 16.91 | 16．83 | Intermittent walking in water | Mind-body exercise | No intervention | No intervention | No intervention | No intervention | Ham-D |
| Cohen et al.,1995[79] | America | 17 | 16 |  | 15 | 15 | Progressive strength training program | 60 min  3 weekly 8weeks | Mind-body exercise | Strength training program for the control group | 60 min  3 weekly  8 weeks | resistance training | BDI |
| Nasstasia et al.,2019[80] | Australia | 34 | 34 |  | 20.75 | 20.75 | Comprehensive multimodal exercise intervention combined with motivational interviewing (MI). | 60 min  3 weekly 12weeks | Mind-body exercise | No intervention | No intervention | No intervention | BDI-II |
| Rodrigues et al.,2021[88] | Portugal | 34 | 34/36 | 62/42 | 13-18 | 13-18 | Qigong practice | 15-20 min,  1 weekly,  6 weeks | Mind-body exercise | CG1:Watch Video  CG2:No intervention | 30min,  1 weekly,  6 weeks | CG1: Cognitive behavioral therapy CG2:No intervention | 1.STAIC 2.Salivary Cortisol Test |
| Cioffi et al.,2023[81] | America | 14/14 | 14 | 13/29 | 15.5/15.5 | 16 | EG1: BOXVR game: boxing movements combined with body movements to dodge obstacles.  EG2: Participants followed an instructional video for their workout, with movements similar to those in the BOXVR game. | 10 min,  5 weekly,  3 weeks | EG1: Mind-body exercise EG2：High-intensity interval training | No intervention | No intervention | No intervention | PASF |
| Parajuli et al.,2022[89] | India | 44 | 45 | 0/89 | 12.71 | 12.60 | Yoga practice | 60 min,  4 weekly,  8 weeks | Mind-body exercise | Jogging, stretching exercises and joint relaxation exercises. | 60 min,  4 weekly,  8 weeks | Comprehensive exercise | STAIC |
| Zhang et al., 2021[83] | China | 485 | 469 | 456/498 | 13.5 | 13.5 | Participants engaged in and shared home workout videos and photos through the peer-based live-streaming app REAP. These activities were designed by exercise physiologists and monitored via the app, ensuring that students regularly participated in physical exercise. | 15 min,  4 weekly,  2 weeks | Comprehensive exercise | Promote students' physical activity and eye relaxation during home study through health education, SMS reminders, and access to home workout videos. | 15 min,  4 weekly,  2 weeks | Cognitive behavioral therapy | SCAS |
| Smits et al.,2008[84] | America | 19/21 | 20 | 15/45 | 19.53/19.86 | 22.65 | EG1：Running exercise with a target heart rate of 70% of the maximum heart rate.  EG2：Aerobic exercise with a target heart rate of 70% of the maximum heart rate, combined with cognitive restructuring techniques to reframe perceptions of bodily sensations, aiming to reduce anxiety sensitivity. | 20min  3 weekly  2 weeks | EG1:Moderate-to-vigorous exercise  EG2: Mind-body exercise | No intervention | No intervention | No intervention | BAI |

EG: experimental group; CG: control group; NR: no report; BDI-II: Beck Depression Inventory-II；QIDS-A-CR：Quick Inventory of Depression Symptomatology-Adolescent Version-Clinician Rating；CDRS-R：Children’s Depression Rating Scale - Revised；PHQA：Patient Health Questionnaire Anxiety and Depression; CESD-10：Center for Epidemiologic Depression Scale; BRUMS: Brunel Mood Scala; RCDS: Reynolds Child Depression Scale；HADS：Hospital Anxiety and Depression Scale；SMFQ：Short Mood and Feelings Questionnaire; DIKJ: Depressions-Inventar für Kinder und Jugendliche；PHQ-9：Patient Health Questionnaire-9；SCL-90-R：Symptom Checklist-90-Revised；Ham-D：Hamilton Rating Scale for Depression；CDI：Children's Depression Inventory. BRUMS：Brunel Mood Scale；SCARED：Screen for Childhood Anxiety-Related Disorders；HADS：Hospital Anxiety and Depression Scale；:STAI：State-Trait Anxiety Inventor；SCAS：Spence Children’s Anxiety Scale； STAIC：State-Trait Anxiety Inventory for Children； PASF：Pediatric Anxiety Short Form 8a；SCAS：​the Chinese version of the 45-item Spence Children's Anxiety Scale；SCL-90-R：Symptom Check List-90-Revision**Table 3**Mathodogical quality of included studies

| **study** | **Study quality** | | | | | **Scroe**  **(0-5)** | **Study reporting** | | | | | | | | | | **Scroe**  **(0-10)** | **Scroe**  **total** | |
| --- | --- | --- | --- | --- | --- | --- | --- | --- | --- | --- | --- | --- | --- | --- | --- | --- | --- | --- | --- |
| **1** | **2** | **3** | **4** | **5** | **6a** | **6b** | **6c** | **7** | **8a** | **8b** | **9** | **10** | **11** | **12** | **(0-15)** |
| Brush et al., 2020[85] | 1 | 1 | 1 | 1 | 1 | **5** | 0 | 0 | 1 | 1 | 1 | 1 | 1 | 0 | 1 | 1 | **7** | 12 |
| Uebelacker et al2022[62] | 1 | 1 | 1 | 1 | 1 | **5** | 1 | 1 | 1 | 1 | 0 | 0 | 1 | 0 | 0 | 0 | **5** | 10 |
| Hughes et al.,2013[69] | 1 | 1 | 1 | 1 | 1 | **5** | 1 | 1 | 1 | 1 | 1 | 1 | 1 | 1 | 1 | 1 | **10** | 15 |
| Saltan PT, 2021[70] | 1 | 1 | 1 | 1 | 1 | **5** | 0 | 0 | 0 | 0 | 1 | 1 | 1 | 0 | 0 | 0 | **3** | 8 |
| Bazzano et al.,2022[63]  2022 | 1 | 1 | 0 | 1 | 0 | **3** | 1 | 0 | 0 | 1 | 1 | 1 | 1 | 0 | 0 | 0 | **5** | 8 |
| Ahmed et al.,2023[71] | 1 | 1 | 1 | 1 | 0 | **4** | 1 | 0 | 0 | 1 | 1 | 1 | 1 | 0 | 0 | 0 | **5** | 9 |
| Goldfield et al., 2015[95] | 1 | 1 | 1 | 1 | 0 | **5** | 1 | 1 | 1 | 1 | 1 | 1 | 1 | 0 | 1 | 0 | **8** | 13 |
| Petty et al., 2009[73] | 1 | 1 | 1 | 1 | 1 | **4** | 1 | 0 | 1 | 1 | 1 | 1 | 1 | 0 | 1 | 0 | **7** | 11 |
| Williams et al.,2019[74]  2019 | 1 | 1 | 1 | 1 | 0 | **4** | 1 | 0 | 1 | 1 | 1 | 1 | 1 | 0 | 0 | 0 | **6** | 10 |
| .Daley et al., 2006[75] | 1 | 1 | 0 | 1 | 0 | **3** | 1 | 1 | 1 | 1 | 1 | 1 | 1 | 0 | 1 | 0 | **8** | 11 |
| Philippot et al., 2022[64] | 1 | 1 | 1 | 1 | 1 | **5** | 0 | 0 | 1 | 1 | 1 | 1 | 1 | 0 | 1 | 0 | **6** | 11 |
| Tennant et al., 2017[65] | 1 | 1 | 1 | 1 | 1 | **5** | 1 | 1 | 1 | 1 | 1 | 1 | 1 | 0 | 1 | 0 | **8** | 13 |
| Carei et al.,2010[66] | 1 | 1 | 0 | 1 | 0 | **3** | 1 | 1 | 0 | 0 | 1 | 1 | 1 | 0 | 0 | 0 | **5** | 8 |
| Wunram et al., 2017[76] | 1 | 1 | 1 | 1 | 1 | **5** | 0 | 1 | 1 | 1 | 1 | 1 | 1 | 0 | 1 | 0 | **7** | 12 |
| Zhang et al., 2018[77] | 1 | 1 | 1 | 1 | 1 | **5** | 1 | 1 | 1 | 1 | 1 | 1 | 1 | 0 | 0 | 0 | **7** | 12 |
| Philippot et al., 2019[67] | 1 | 1 | 1 | 1 | 1 | **5** | 1 | 0 | 1 | 1 | 1 | 1 | 1 | 0 | 1 | 0 | **7** | 12 |
| Jeong et al.,2005[68] | 1 | 1 | 1 | 1 | 1 | **5** | 0 | 0 | 0 | 0 | 1 | 1 | 1 | 0 | 0 | 0 | **3** | 8 |
| Dabidy et al.,2011[86] | 1 | 1 | 1 | 1 | 0 | **4** | 1 | 0 | 1 | 0 | 1 | 1 | 1 | 0 | 1 | 0 | **6** | 10 |
| Cohen et al.,1995[79] | 1 | 1 | 0 | 1 | 0 | **3** | 0 | 0 | 0 | 0 | 1 | 1 | 1 | 0 | 0 | 0 | **3** | 6 |
| Nasstasia et al.,2019[80] | 1 | 1 | 1 | 1 | 1 | **5** | 1 | 0 | 1 | 1 | 1 | 1 | 1 | 1 | 1 | 1 | **9** | 14 |
| Parajuli et al., 2022[89] | 1 | 1 | 1 | 1 | 1 | **5** | 1 | 0 | 1 | 1 | 1 | 1 | 1 | 0 | 0 | 0 | **6** | 11 |
| Rodrigueset al.,2021[88] | 1 | 1 | 1 | 1 | 0 | **4** | 1 | 0 | 0 | 0 | 1 | 1 | 1 | 0 | 0 | 0 | **4** | 8 |
| Cioff et al,. 2023[81] | 1 | 1 | 1 | 1 | 1 | **5** | 1 | 0 | 1 | 0 | 1 | 1 | 1 | 0 | 1 | 0 | **5** | 10 |
| Zhang et al,.2021[83] | 1 | 1 | 1 | 1 | 0 | **4** | 1 | 0 | 1 | 1 | 1 | 1 | 1 | 0 | 1 | 0 | **6** | 10 |
| Smits et al.,2008[84] | 1 | 1 | 0 | 1 | 0 | **4** | 0 | 0 | 1 | 1 | 1 | 0 | 1 | 0 | 1 | 0 | **5** | 9 |
|  |  |  |  |  |  |  |  |  |  |  |  |  |  |  |  | Mean sorce: | | 10 |

**Study quality**: 1=Eligibility criteria specifed; 2=Randomization specifed; 3=Allocation concealment; 4=Groups similar at baseline; 5=Blinding of assessor (for at least one key outcome). Study reporting: 6=Outcome measures assessed in 85% of participants (6a=1 point if completion rate is [85%; 6b=1 point if adverse events are reported; 6c=1 point if exercise attendance is reported); 7=Intention-to-treat analysis; 8=Between-group statistical comparisons reported (8a=1 point if between-group statistical comparisons are reported for the primary outcome measure of interest; 8b=1 point if between-group statistical comparisons are reported for at least one secondary outcome measure); 9=Point measures and measures of variability for all reported outcome measures; 10=Activity monitoring in control groups; 11=Relative exercise intensity remained constant; 12=Exercise volume and energy expenditure. The studies were classifed according to their total TESTEX score as ‘high quality’ (≥12 points, green color), ‘good quality’ (7 to 11 points, yellow color), or ‘low quality’ (≤6 points, red color)**Table 4** Ranking of SUCRA probabilities

| **Intervention** | **Sucra** | **Rank** |
| --- | --- | --- |
| High-intensity interval | 85.4 | 1 |
| Resistance training | 82.2 | 2 |
| Mind-body exercise | 81.7 | 3 |
| Moderate-to-vigorous exercise | 52.9 | 4 |
| Cognitive behavioral therapy | 43.5 | 5 |
| Comprehensive exercise | 39.2 | 6 |
| Stretching exercise | 33.2 | 7 |
| No intervention | 20.5 | 8 |
| Usual care | 11.6 | 9 |
